# Supplementary material
Source: PubMed Central journal article supplement (PMC6531830)
Supplement: mmc1.pdf [file mmc1.pdf]

**Biophysical Journal, Volume 116**

**Supplemental Information**

**Engineered Passive Potassium Conductance in the KR2 Sodium Pump**

**Arend Vogt, Arita Silapetere, Christiane Grimm, Florian Heiser, Maximiliano Ancina Möller, and Peter Hegemann**

# Supplementary Figure 1

A

| abbreviation   | organism                                                                  | protein ID | type (habitat)                                | literature<br>(cited in the main text) |
|----------------|---------------------------------------------------------------------------|------------|-----------------------------------------------|----------------------------------------|
| KR2            | <i>Dokdonia eikasta</i><br>(basonym: <i>Krokinobacter eikastus</i> )      | N0DKS8     | flavobacterium<br>(seawater)                  | Yoon et al. 2012<br>Inoue et al. 2013  |
| NdR2<br>(NQRh) | <i>Nonlabens dokdonensis</i><br>(basonym: <i>Donghaeana dokdonensis</i> ) | L7W3L9     | flavobacterium<br>(seawater)                  | Yi et al. 2012<br>Kwon et al. 2013     |
| NMR2           | <i>Nonlabens marinus</i>                                                  | W8VZ79     | flavobacterium<br>(seawater)                  | Yoshizawa et al. 2014                  |
| YIK11          | <i>Nonlabens sp. YIK11</i>                                                | X2G242     | flavobacterium<br>(seawater)                  | Kwon et al. 2016                       |
| GLR            | <i>Gillisia limnaea</i>                                                   | H2BW50     | flavobacterium<br>(antarctic lake)            | Balashov et al. 2014                   |
| IAR            | <i>Indibacter alkaliphilus</i>                                            | S2D3K4     | (non-flavo) bacterium<br>(halo alkaline lake) | Li et al. 2015                         |
| TrNaR1         | <i>Truepera radiovictrix</i>                                              | D7CSE2     | (non-flavo) bacterium                         | Ivanova et al. 2011                    |
| TrNaR2         |                                                                           | D7CW88     | (hot alkaline spring)                         |                                        |

B

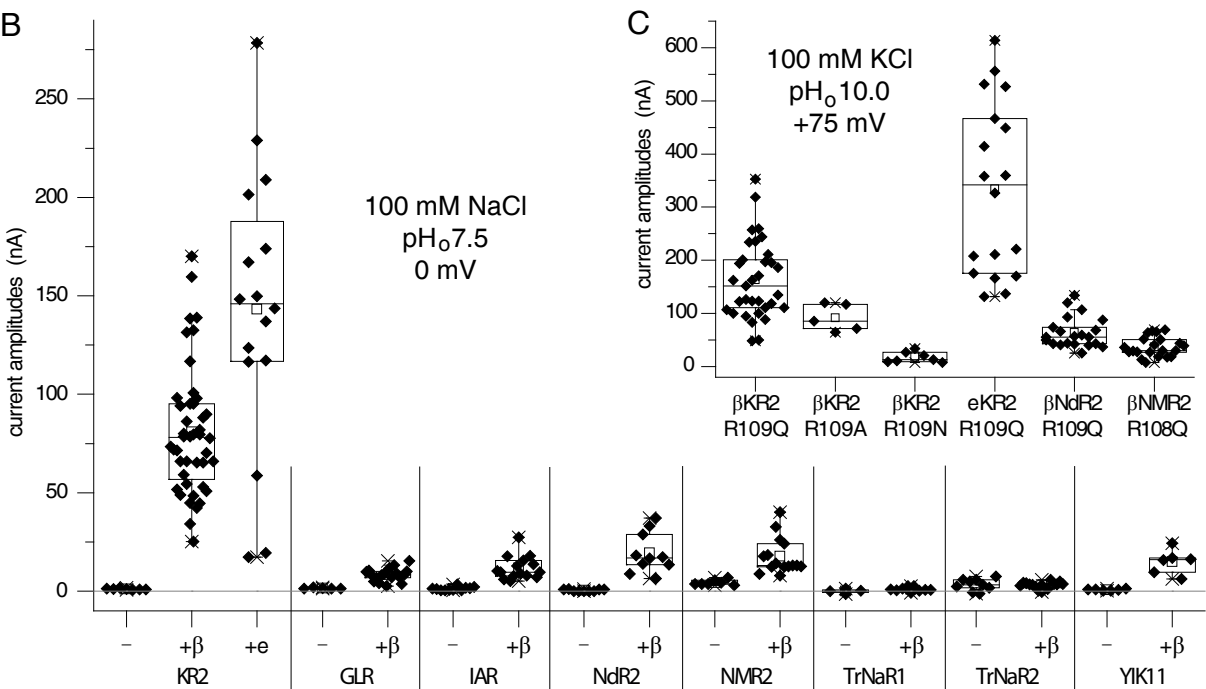

C

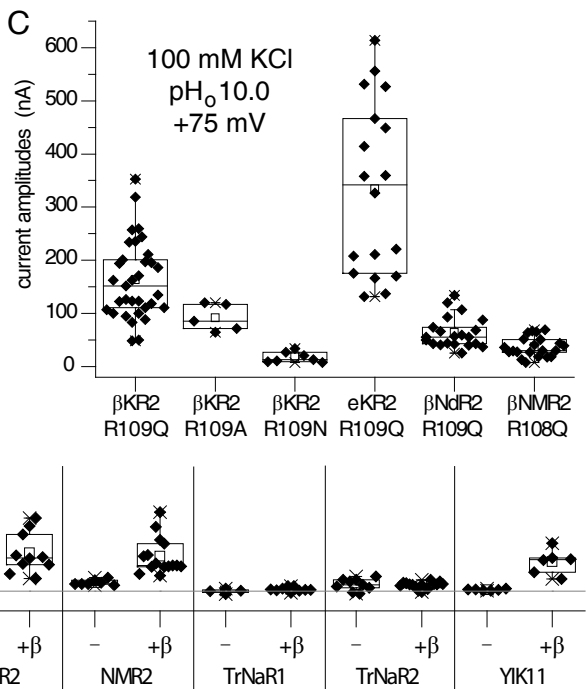

D

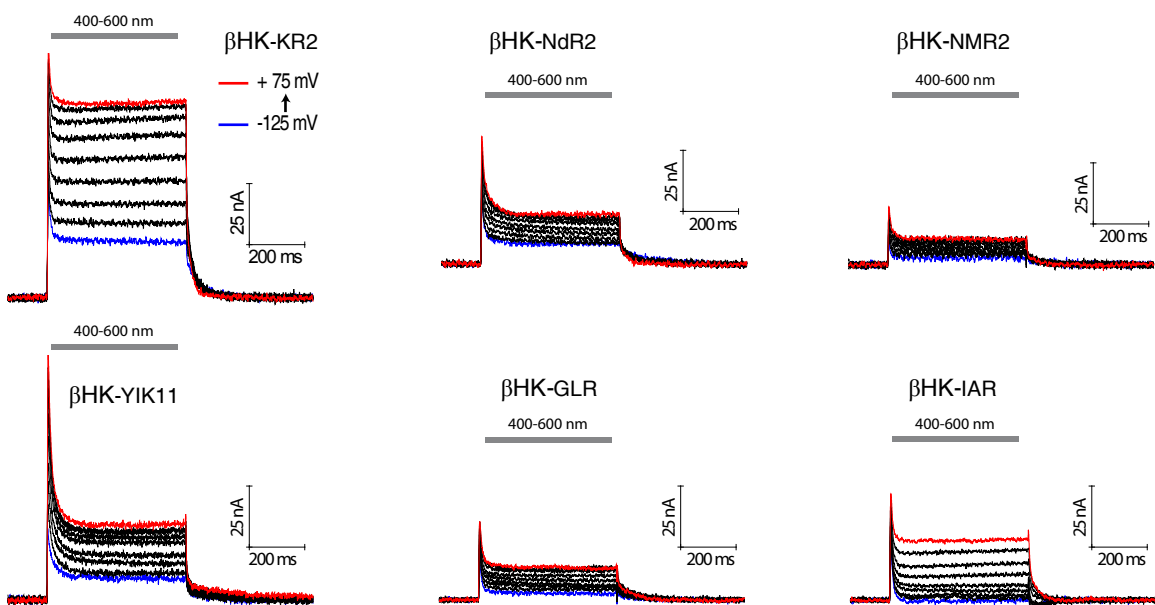

**Supplementary Figure 1: Comparison of light-driven Na<sup>+</sup> pumps from different organisms in oocytes. (A)** List of NaRs tested in this study, with their origin and protein ID; references are provided in the main article. **(B-C)** Comparison of absolute stationary photocurrent amplitudes, shown as box-chart diagrams. Detectable photocurrents were only observed after addition of the “βHK”-targeting sequence (the eKR2 targeting design was only tested for KR2). **(C)** Stationary photocurrent amplitudes of the various R109X mutants are shown. In addition to KR2, only NdR2<sub>βHK</sub> and NMR2<sub>βHK</sub> provided sufficient photocurrents for testing the effect of the R109Q mutation (R108 in NMR2). **(D)** Photocurrent traces of various NaRs (all with “βHK”) in buffer containing 100 mM NaCl, pH<sub>o</sub> 7.5. The IAR rhodopsin was remarkable in that produced showed negative peak-shaped photocurrents at negative holding potentials.





## Supplementary Figure 4:

### Composition of all buffers used for oocytes and ND7/23-cells

| extracellular buffer<br>oocytes | composition [mM]                                                                                                       | pH<br>(adjusted with) |
|---------------------------------|------------------------------------------------------------------------------------------------------------------------|-----------------------|
| Na 10.0                         | NaCl [100], MgCl <sub>2</sub> [1.0], CaCl <sub>2</sub> [0.1], glycine [5]                                              | 10.0 (NaOH)           |
| Na 7.5                          | NaCl [100], MgCl <sub>2</sub> [1.0], CaCl <sub>2</sub> [0.1], MOPS [5]                                                 | 7.5 (NaOH)            |
| Na 5.0                          | NaCl [100], MgCl <sub>2</sub> [1.0], CaCl <sub>2</sub> [0.1], citric acid/Na-citrate [5]                               | 5.0 (NaOH)            |
| KCl 10.0                        | KCl [100], MgCl <sub>2</sub> [1.0], CaCl <sub>2</sub> [0.1], glycine [5]                                               | 10.0 (KOH)            |
| KCl 7.5                         | KCl [100], MgCl <sub>2</sub> [1.0], CaCl <sub>2</sub> [0.1], MOPS [5]                                                  | 7.5 (KOH)             |
| KCl 5.0                         | KCl [100], MgCl <sub>2</sub> [1.0], CaCl <sub>2</sub> [0.1], citric acid [5]                                           | 5.0 (KOH)             |
| LiCl 10.0                       | LiCl [100], MgCl <sub>2</sub> [1.0], CaCl <sub>2</sub> [0.1], glycine [5]                                              | 10.0 (LiOH)           |
| LiCl 7.5                        | LiCl [100], MgCl <sub>2</sub> [1.0], CaCl <sub>2</sub> [0.1], MOPS [5]                                                 | 7.5 (LiOH)            |
| LiCl 5.0                        | LiCl [100], MgCl <sub>2</sub> [1.0], CaCl <sub>2</sub> [0.1], citric acid [5]                                          | 5.0 (LiOH)            |
| 50/50 NaCl/KCl                  | NaCl [50], KCl [50], MgCl <sub>2</sub> [1.0], CaCl <sub>2</sub> [0.1], glycine [5]                                     | 10.0 (NaOH)           |
| 50 KCl                          | KCl [50], MgCl <sub>2</sub> [1.0], CaCl <sub>2</sub> [0.1], glycine [5]                                                | 10.0 (KOH)            |
| KCl 10.0 (titration)            | KCl [200/100/50/25/10/0], glucose [0/0/50/75/90/100],<br>MgCl <sub>2</sub> [1.0], CaCl <sub>2</sub> [0.1], glycine [5] | 10.0 (KOH)            |
| NMG 10.0                        | NMG [100], MgCl <sub>2</sub> [1.0], CaCl <sub>2</sub> [0.1], glycine [5]                                               | 10.0 (HCl)            |
| NMG 7.5                         | NMG [100], MgCl <sub>2</sub> [1.0], CaCl <sub>2</sub> [0.1], MOPS [5]                                                  | 7.5 (HCl)             |
| Na-Gluk 10.0                    | Na-gluconate [100], MgCl <sub>2</sub> [1.0], CaCl <sub>2</sub> [0.1], glycine [5]                                      | 10.0 (NaOH)           |
| Na-Gluk 7.5                     | Na-gluconate [100], MgCl <sub>2</sub> [1.0], CaCl <sub>2</sub> [0.1], MOPS [5]                                         | 7.5 (NaOH)            |
| MgCl <sub>2</sub> 7.5           | MgCl <sub>2</sub> [100], CaCl <sub>2</sub> [0.1], MOPS [5]                                                             | 10.0 (NaOH)           |
| CaCl <sub>2</sub> 7.5           | MgCl <sub>2</sub> [1.0], CaCl <sub>2</sub> [100], MOPS [5]                                                             | 7.5 (NaOH)            |

| extracellular<br>buffer<br>ND7/23-cells | composition [mM]                                                                                                                         | pH<br>(adjusted with) | osmolarity<br>(adjusted with<br>glucose) |
|-----------------------------------------|------------------------------------------------------------------------------------------------------------------------------------------|-----------------------|------------------------------------------|
| NaCl 9.0                                | NaCl [110], KCl [1], MgCl <sub>2</sub> [1.0], CaCl <sub>2</sub> [1.0], Tris [10],<br>TEA [20], CsCl [5], BaCl <sub>2</sub> [5]           | 9.0 (HCl)             | 310 mOsm                                 |
| KCl 9.0                                 | NaCl [1], KCl [110], MgCl <sub>2</sub> [1.0], CaCl <sub>2</sub> [1.0], Tris [10],<br>TEA [20], CsCl [5], BaCl <sub>2</sub> [5]           | 9.0 (HCl)             | 310 mOsm                                 |
| LiCl 9.0                                | NaCl [1], KCl [1], LiCl [110], MgCl <sub>2</sub> [1.0], CaCl <sub>2</sub> [1.0], Tris [10],<br>TEA [20], CsCl [5], BaCl <sub>2</sub> [5] | 9.0 (HCl)             | 310 mOsm                                 |

| intracellular<br>buffer<br>ND7/23-cells        | composition [mM]                                                                                                                              | pH<br>(adjusted with) | osmolarity<br>(adjusted with<br>glucose) |
|------------------------------------------------|-----------------------------------------------------------------------------------------------------------------------------------------------|-----------------------|------------------------------------------|
| 0.1 mM NaCl<br>0.1 mM KCl<br>pH 7.2            | NaCl [0.1], KCl [0.1], NMG [110], MgCl <sub>2</sub> [1.0], CaCl <sub>2</sub> [1.0],<br>EGTA [10], HEPES [10]                                  | 7.2 (HCl)             | 290 mOsm                                 |
| 1 mM NaCl<br>1 mM KCl<br>pH 7.2                | NaCl [1], KCl [1], NMG [110], MgCl <sub>2</sub> [1.0], CaCl <sub>2</sub> [1.0],<br>EGTA [10], HEPES [10]                                      | 7.2 (HCl)             | 290 mOsm                                 |
| 110 mM NaCl<br>1 mM KCl<br>pH 7.2              | NaCl [110], KCl [1], MgCl <sub>2</sub> [1.0], CaCl <sub>2</sub> [1.0],<br>EGTA [10], HEPES [10]                                               | 7.2 (NaOH)            | 290 mOsm                                 |
| 1 mM NaCl<br>110 mM KCl<br>pH 7.2              | NaCl [1], KCl [110], MgCl <sub>2</sub> [1.0], CaCl <sub>2</sub> [1.0],<br>EGTA [10], HEPES [10],<br>TEA [20], CsCl [5], BaCl <sub>2</sub> [5] | 7.2 (KOH)             | 290 mOsm                                 |
| 1 mM NaCl<br>1 mM KCl<br>110 mM LiCl<br>pH 7.2 | NaCl [1], KCl [1], LiCl [110], MgCl <sub>2</sub> [1.0], CaCl <sub>2</sub> [1.0],<br>EGTA [10], HEPES [10]                                     | 7.2 (LiOH)            | 290 mOsm                                 |

## Supplementary Figure 5

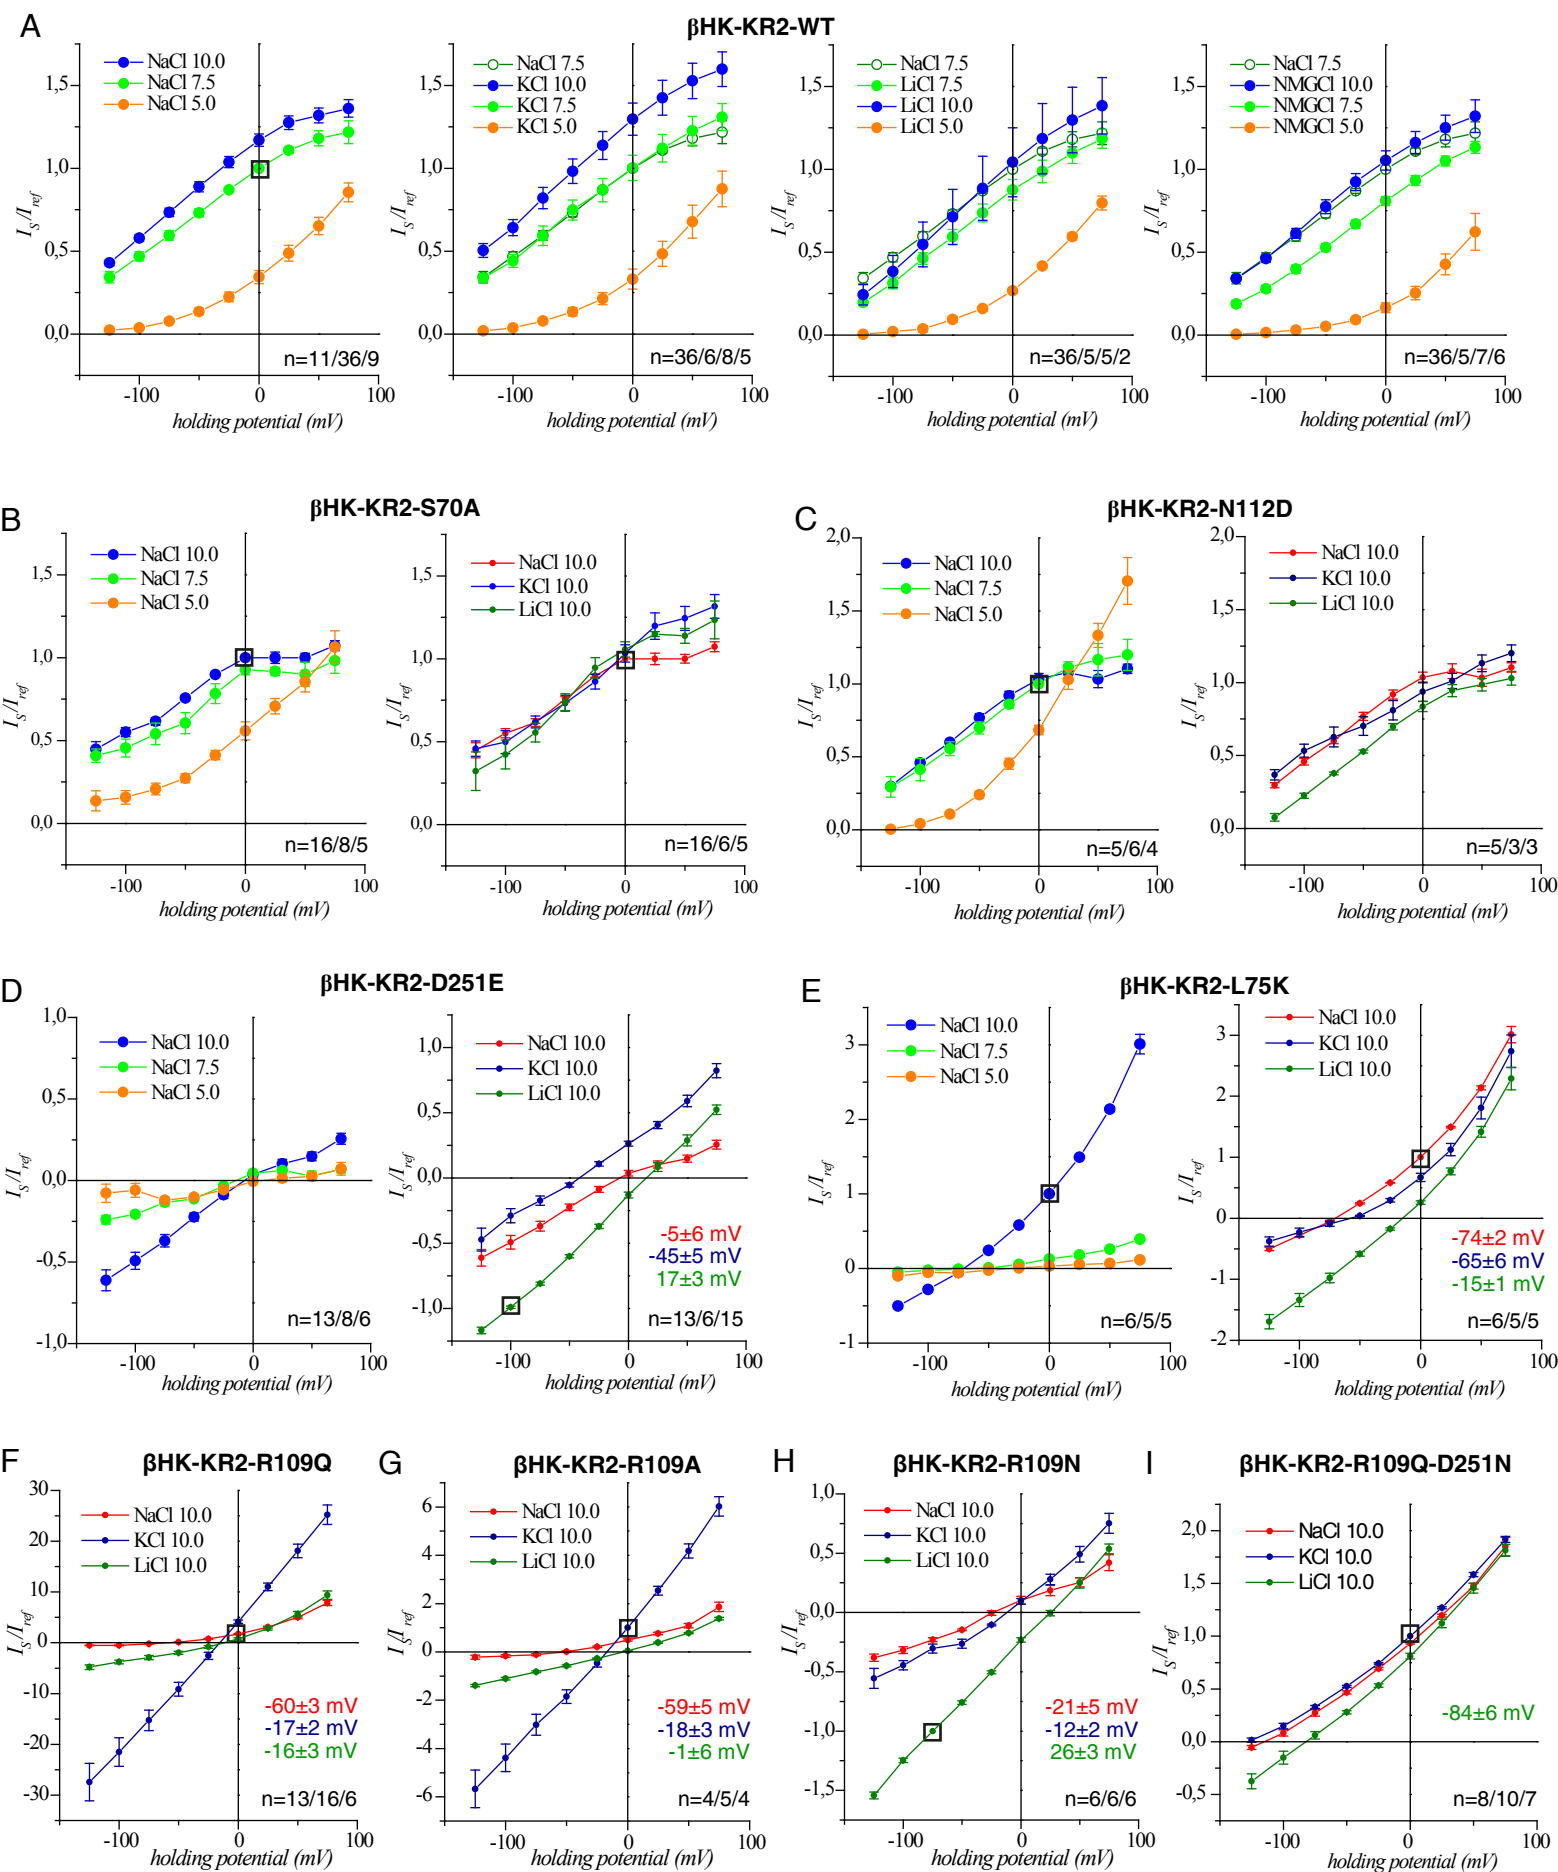

# Supplementary Figure 6

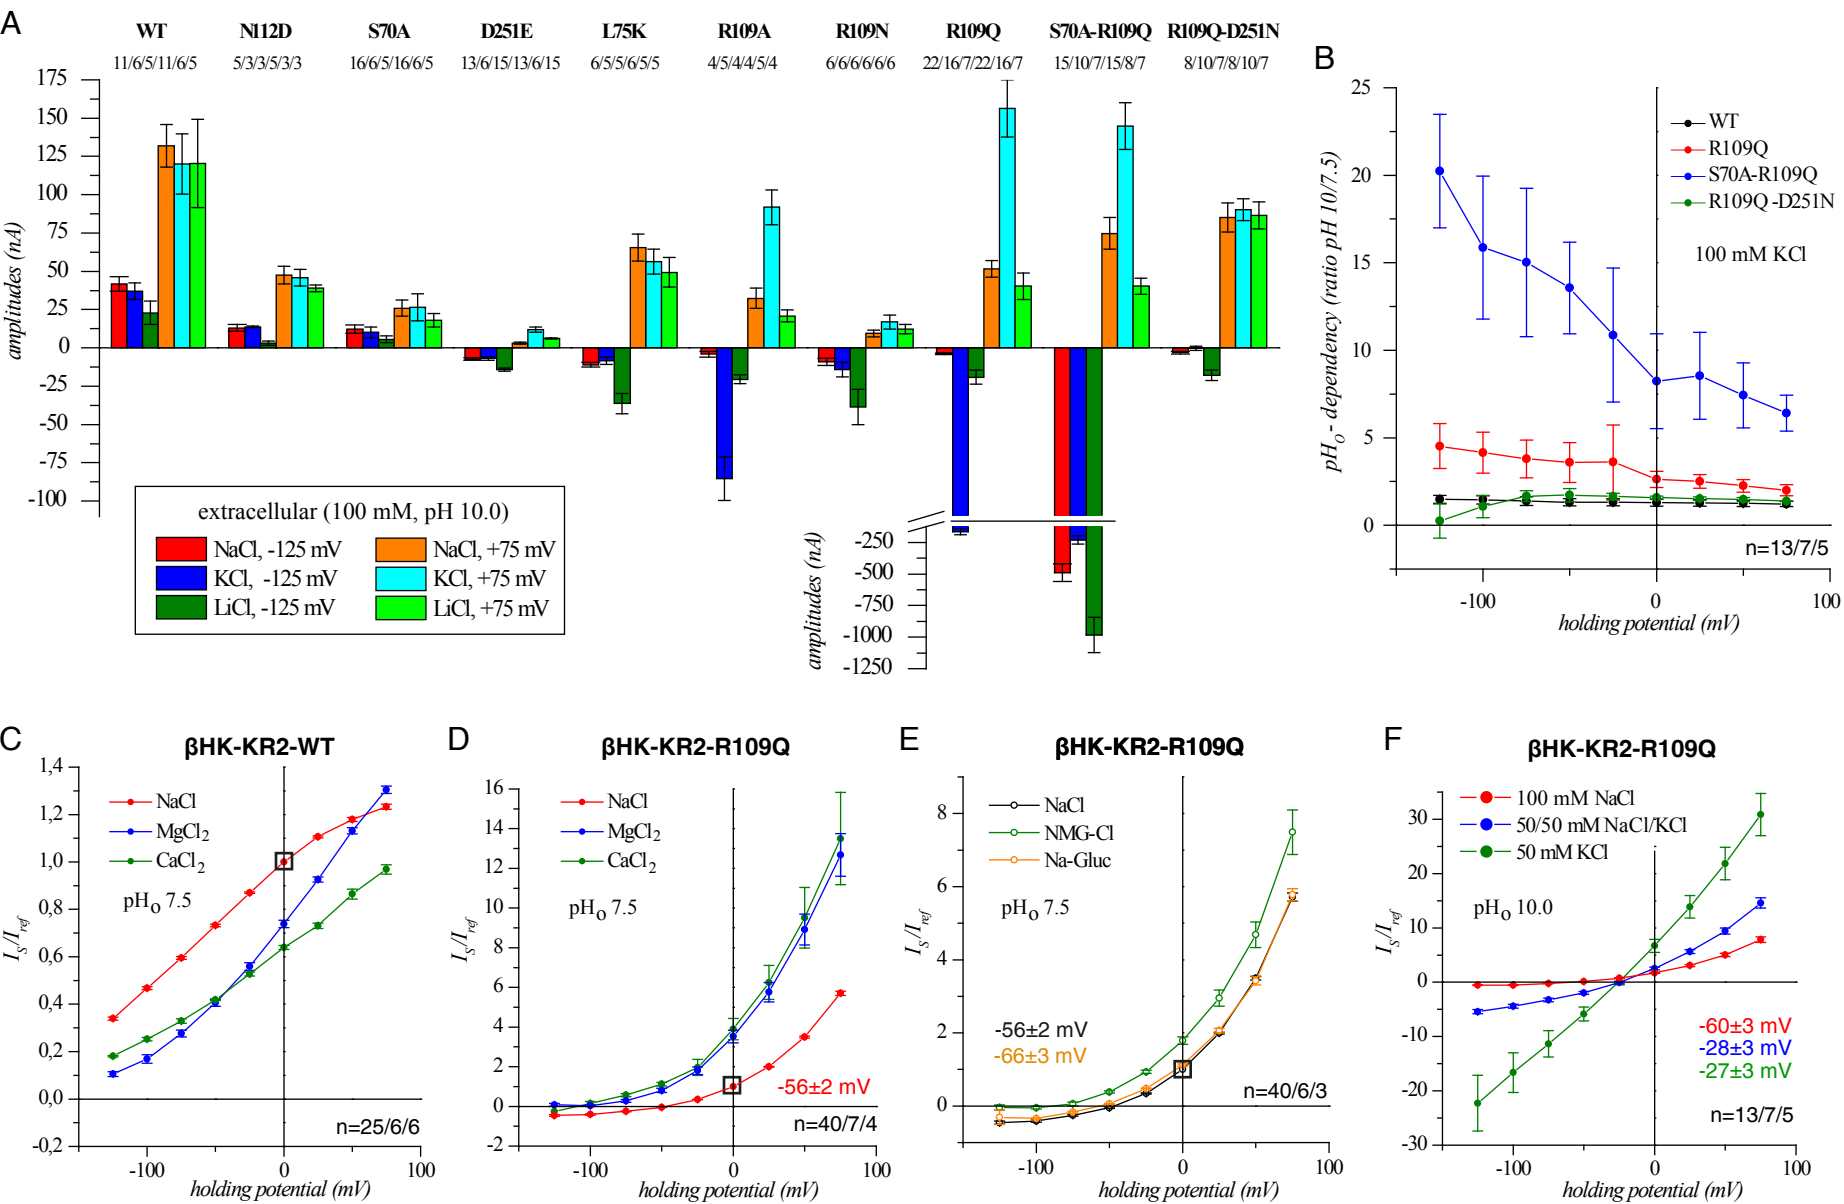

**Supplementary Figure 6:** Additional results obtained from electrophysiological measurements in oocytes. (A) Comparison of the absolute stationary photocurrent amplitudes for different extracellular buffer conditions and holding potentials. The mutants D116N and D251N are not shown because no obvious stationary photocurrents were observed. (B) The  $pH_0$ -dependency is illustrated as the ratio between the photocurrents at  $pH_0$  10.0 and  $pH_0$  7.5 (with 100 mM KCl). Current-voltage plots for (C) KR2-WT and (D-E) KR2-R109Q at different extracellular ion conditions (all at a concentration of 100 mM).  $Ca^{2+}$  and  $Mg^{2+}$  are not transported but influence the photocurrents, whereas removal of extracellular  $Cl^-$  does not influence photocurrents. Data indicate minor passive  $Na^+$  conductance. Small black boxes show the respective condition used for normalization. (F) Current-voltage-plot of KR2-R109Q in different extracellular  $Na^+$  and  $K^+$  concentrations, illustrating the competition between  $Na^+$  and  $K^+$  (photocurrents were normalized to 100 mM NaCl,  $pH_0$  7.5, not shown in this plot).  $K^+$  determines the reversal potential, whereas  $Na^+$  shows an inhibitory effect.

# Supplementary Figure 7

A

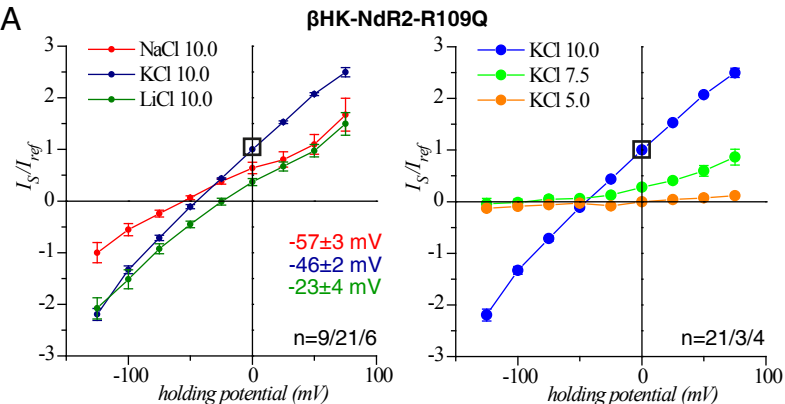

B

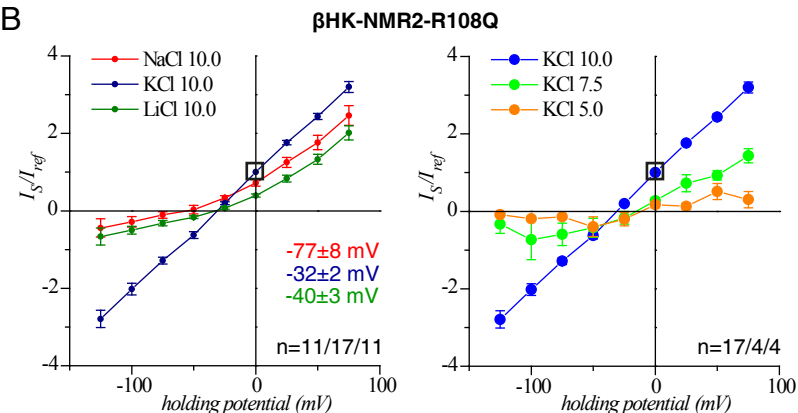

C

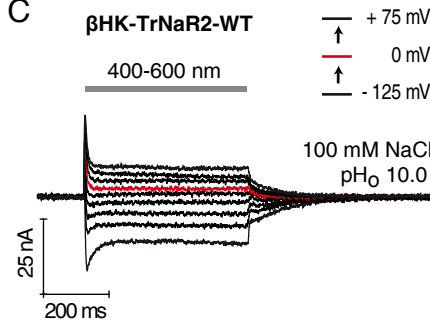

D

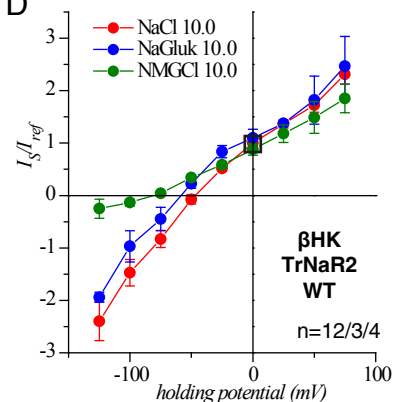

**Supplementary Figure 7:** Further electrophysiological analysis of Ndr2<sub>BHK</sub>-R109Q, NMR2<sub>BHK</sub>-R108Q, and TrNaR2<sub>BHK</sub>-WT in oocytes. (A-B) Current-voltage plots of Ndr2<sub>BHK</sub>-R109Q and NMR2<sub>BHK</sub>-R108Q demonstrate different ion-selectivities of the mutants and their pH<sub>o</sub>-dependency (normalized to 100 mM KCl, pH<sub>o</sub> 10, and 0 mV). (C) Photocurrent traces of TrNaR2<sub>BHK</sub>-WT indicate leakiness in the WT protein. However, amplitudes were poor, and only the best measurement is shown. (D) Current-voltage plot of TrNaR2<sub>BHK</sub>-WT after removal of Cl<sup>-</sup> or Na<sup>+</sup> ions (normalized to 100 mM NaCl, pH<sub>o</sub> 10, and 0 mV). Results indicate leakiness for cations.



# Supplementary Figure 8

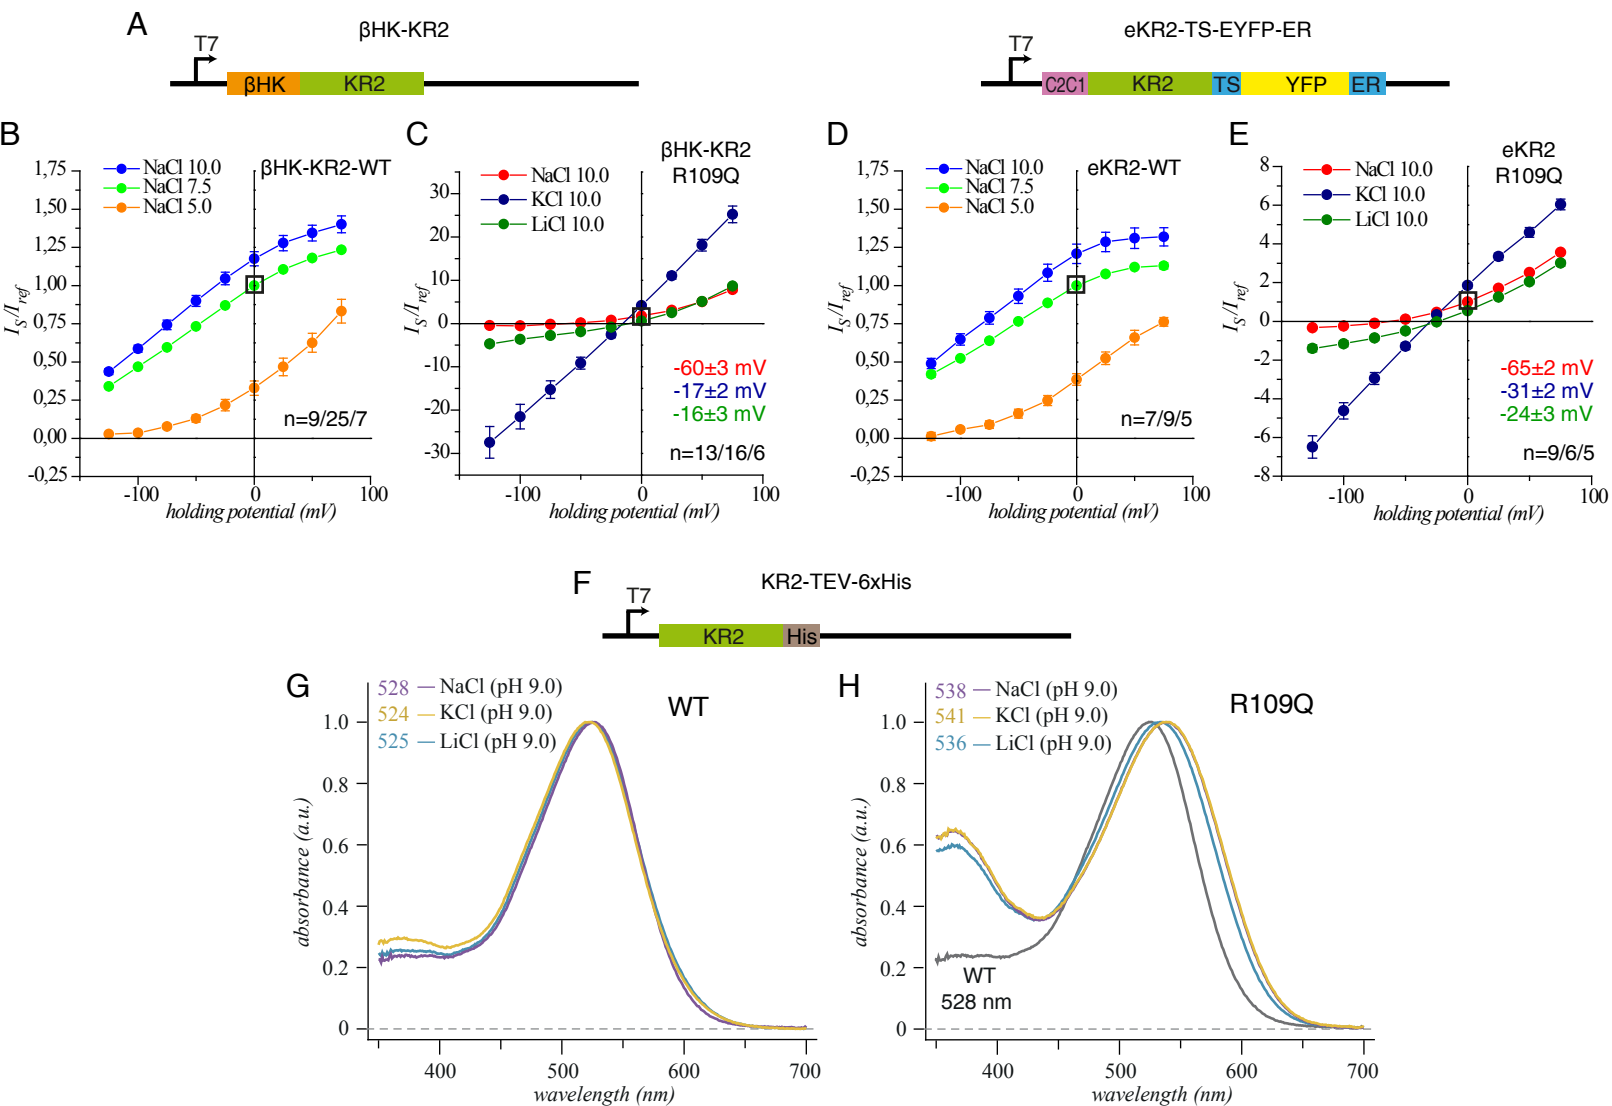

**Supplementary Figure 8:** Influence of construct design and spectral characteristics of KR2. (A) Structure of the targeting constructs KR2 $_{\beta\text{HK}}$  and eKR2; nucleotide sequences of each construct are shown in Supplementary Fig. 3. (B-E) Comparison of the two targeting constructs, both tested in oocytes, for KR2-WT and KR2-R109Q. Photocurrents were normalized to 0 mV, 100 mM NaCl, and pH 7.5 (WT) or pH 10.0 (R109Q). The pH $_0$ -dependency was similar for all constructs, but differences in the reversal potentials were observed for KR2-R109Q. (F) The constructs utilized for the pH-assay and for purification from *E. coli* are functional without any additional targeting. (G-H) Absorption spectra of purified KR2-WT and KR2-R109Q, measured at pH 9.0 and in 110 mM of the indicated salt. KR2-R109Q is characterized by an increased amount of protein with a deprotonated Schiff-base (365 nm) and an increased cation-dependency of the absorption maxima.

# Supplementary Figure 9

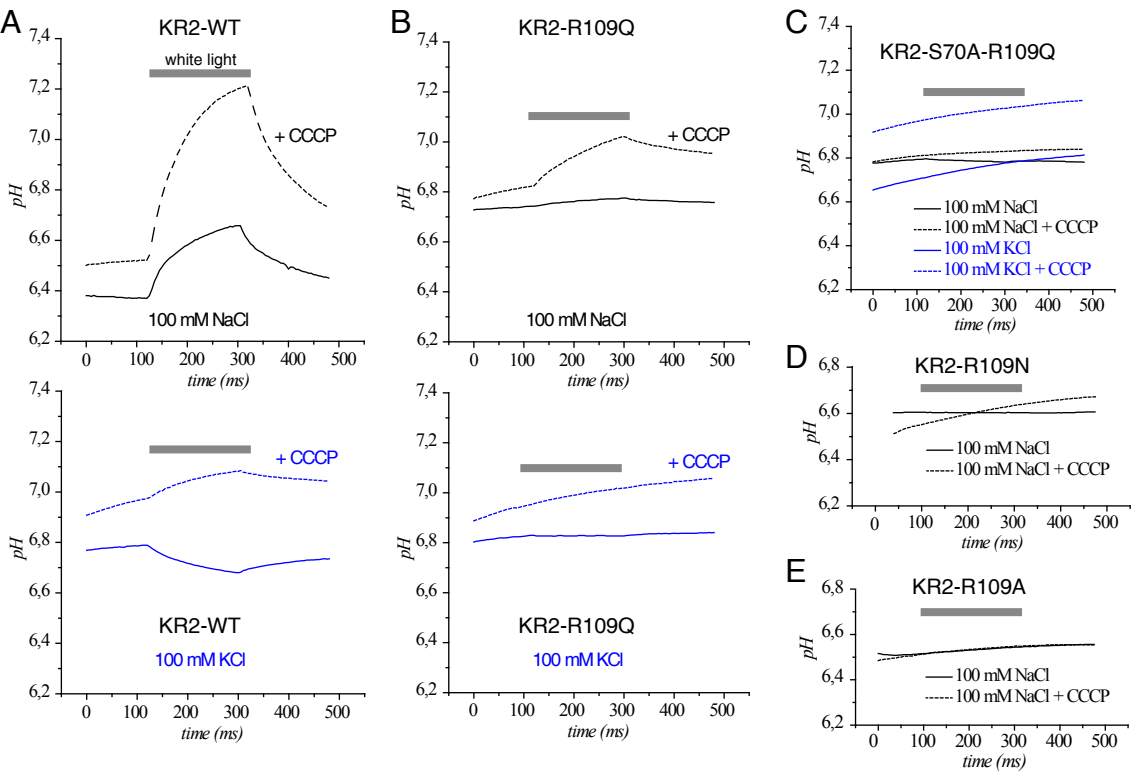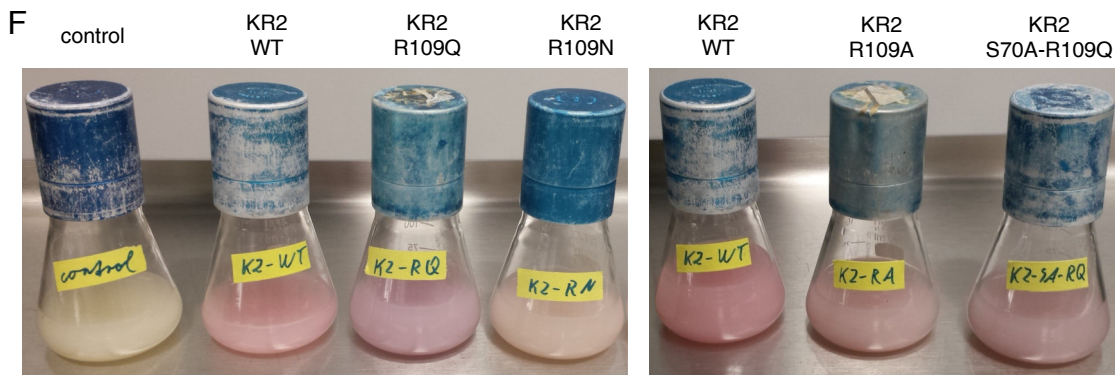

**Supplementary Figure 9:** Analysis of light-induced pH changes in suspensions of *Escherichia coli* expressing various KR2 mutants. Suspensions of cells expressing (A) KR2-WT, (B, D-E) KR2-R109Q/N/A, and (C) KR2-S70A-R109Q were tested before (continuous line) and after (dotted lines) addition of the protonophore, carbonyl cyanide m-chlorophenyl hydrazone (CCCP). Only WT and R109Q KR2 exhibited pH-changes during illumination. (F) Photos *E. coli* cell cultures are shown (all concentrated to OD<sub>600</sub> = 10). The faint colors of KR2-R109N, KR2-R109Q, and KR2-S70A-R109Q indicate lower protein expression.

## Supplementary Figure 10:

### Overview of all KR2 constructs and mutants tested in oocytes

|                 | location/motivation/earlier investigations in KR2                                                                          | results                                                                                    |
|-----------------|----------------------------------------------------------------------------------------------------------------------------|--------------------------------------------------------------------------------------------|
| KR2-WT          | /                                                                                                                          | only positive currents                                                                     |
| βKR2-WT         | /                                                                                                                          | only positive currents                                                                     |
| eKR2-WT         | /                                                                                                                          | only positive currents                                                                     |
|                 |                                                                                                                            |                                                                                            |
| βKR2-L32E       | extracellular half channel, interaction partner of R109                                                                    | positive currents + negative currents with K and Li at high electrochemical load (-125 mV) |
| βKR2-S60T       | ion uptake region                                                                                                          | only positive currents                                                                     |
| βKR2-N61P       | ion uptake region, increased proton pumping proposed by Kato et al. 2015 (N61Y), Gushchin et al. 2015 (N61M)               | only positive currents                                                                     |
| βKR2-S64T       | ion uptake region                                                                                                          | only positive currents                                                                     |
| βKR2-S70A       | counter-ion complex, Kato 2015 et al. (S70T/A)                                                                             | studied intensively in this study                                                          |
| βKR2-S70V       | counter-ion complex, Kato 2015 et al. (S70T/A)                                                                             | similar to S70A                                                                            |
| βKR2-L75K       | counter-ion complex, Inoue et al. 2013 (R109A)                                                                             | studied intensively in this study                                                          |
| βKR2-R109Q      | counter-ion complex, Inoue et al. 2013 (R109A)                                                                             | studied intensively in this study                                                          |
| βKR2-R109A      | counter-ion complex, Inoue et al. 2013 (R109A)                                                                             | studied intensively in this study                                                          |
| βKR2-R109N      | counter-ion complex, Inoue et al. 2013 (R109A)                                                                             | studied intensively in this study                                                          |
| βKR2-N112D      | counter-ion complex, Inoue et al. 2013 (N112A/D)                                                                           | studied intensively in this study                                                          |
| βKR2-D116N      | counter-ion complex, Inoue et al. 2013 (D116A/E/N)                                                                         | studied intensively in this study                                                          |
| βKR2-D116E      | counter-ion complex, Inoue et al. 2013 (D116A/E/N)                                                                         | only positive currents, low amplitudes                                                     |
| βKR2-Q244E      | ion-release cavity, interaction partner of R109                                                                            | only positive currents                                                                     |
| βKR2-D251N      | counter-ion complex, Inoue et al. 2013 (D251A/E/N )                                                                        | studied intensively in this study                                                          |
| βKR2-D251E      | counter-ion complex, Inoue et al. 2013 (D251A/E/N )                                                                        | studied intensively in this study                                                          |
| βKR2-G263W      | ion uptake region, increased potassium pumping proposed by Kato et al. 2015 (G263W) and Gushchin et al. 2015 (G263F/G263L) | only positive currents                                                                     |
|                 |                                                                                                                            |                                                                                            |
| βKR2-N61P-G263W | ion uptake region, increased potassium pumping proposed by Kato et al. 2015                                                | only positive currents, low amplitudes, pronounced transient peak current                  |
|                 |                                                                                                                            |                                                                                            |
| βKR2-R109Q-E11D | ion-release cavity, Gushchin et al. 2015 (E11A), Kato et al. 2015 (E11A)                                                   | leaky , low amplitudes                                                                     |
| βKR2-R109Q-E18Q | extracellular side                                                                                                         | leaky , low amplitudes                                                                     |
| βKR2-R109Q-F20A | ion-release cavity                                                                                                         | leaky , low amplitudes                                                                     |
| βKR2-R109Q-E22Q | extracellular side                                                                                                         | similar to R109Q                                                                           |

|                        |                                                                                                  |                                                                                  |
|------------------------|--------------------------------------------------------------------------------------------------|----------------------------------------------------------------------------------|
| βKR2-R109Q-T33D        | transmembrane surface of KR2                                                                     | very low amplitudes                                                              |
| βKR2-R109Q-V67A        | interaction with Schiff-base from intracellular side                                             | leaky for Na/K/Li, high amplitudes (but lower than R109Q-S70A)                   |
| βKR2-R109Q-S70A        | see single mutations                                                                             | studied intensively in this study                                                |
| βKR2-R109Q-S70V        | see single mutations                                                                             | similar to R109Q-S70A but lower amplitudes                                       |
| βKR2-R109Q-L75K        | see single mutations                                                                             | similar to R109Q                                                                 |
| βKR2-R109Q-L75T        | see single mutations                                                                             | leaky for Na/K/Li, low amplitudes                                                |
| βKR2-R109Q-E91Q        | extracellular side                                                                               | leaky, low amplitudes                                                            |
| βKR2-R109Q-R94Q        | extracellular side                                                                               | leaky, low amplitudes                                                            |
| βKR2-R109Q-D98N        | extracellular side                                                                               | leaky                                                                            |
| βKR2-R109Q-D102N       | extracellular side, Gushchin et al. 2015 (D102N), Kato et al. 2015 (D102N)                       | leaky                                                                            |
| βKR2-R109Q-N112D       | see single mutations                                                                             | similar to R109Q leaky                                                           |
| βKR2-R109Q-D116N       | see single mutations                                                                             | no stationary currents                                                           |
| βKR2-R109Q-D116E       | see single mutations                                                                             | leaky, very low amplitudes                                                       |
| βKR2-R109Q-D116A       | see single mutations                                                                             | no stationary currents                                                           |
| βKR2-R109Q-L120D       | interaction with Schiff-base from intracellular side                                             | no currents                                                                      |
| βKR2-R109Q-Q123A       | ion uptake region, Inoue et al. 2013 (Q123A/E/D)                                                 | leaky, low amplitudes                                                            |
| βKR2-R109Q-E160Q       | ion-release cavity, Inoue et al. (E160Q), Gushchin et al. 2015 (E160A), Kato et al. 2015 (E160A) | leaky                                                                            |
| βKR2-R109Q-E237Q       | extracellular side                                                                               | leaky                                                                            |
| βKR2-R109Q-R243Q       | ion-release cavity, Gushchin et al. 2015 (R243Q/A), Kato et al. 2015 (R243A)                     | leaky, low amplitudes                                                            |
| βKR2-R109Q-D251N       | see single mutations                                                                             | studied intensively in this study                                                |
| βKR2-R109Q-D251E       | see single mutations                                                                             | leaky for Na/K/Li, low amplitudes, pH <sub>o</sub> -dependency further increased |
| βKR2-R109Q-D251T       | see single mutations                                                                             | very low amplitudes                                                              |
| βKR2-R109Q-D251H       | see single mutations                                                                             | very low amplitudes                                                              |
| βKR2-R109Q-S254D       | interaction with Schiff-base from intracellular side                                             | no currents                                                                      |
| βKR2-R109Q-S70A-L75K   | see single mutations                                                                             | leakiness for Na/K/Li, very high amplitudes for Li                               |
| βKR2-R109Q-N112D-D251N | see single mutations                                                                             | no stationary currents                                                           |
| βKR2-R109Q-N61P-G263W  | see single mutations                                                                             | no currents                                                                      |
| eKR2-R109A             | see single mutations                                                                             | studied intensively in this study                                                |
| eKR2-R109Q             | see single mutations                                                                             | studied intensively in this study                                                |
| eKR2-R109Q-S70A        | see single mutations                                                                             | studied intensively in this study                                                |
